# Supplementary material for: Salivary Heme Oxygenase-1: A Potential Biomarker for Central Neurodegeneration
Source: PubMed Central journal article supplement — J Cent Nerv Syst Dis. 2021 Jul 7;13:11795735211029114. doi: 10.1177/11795735211029114 (PMC8273869; doi:10.1177/11795735211029114), 2021-07-07
Supplement: sj-pdf-1-cns-10.1177_11795735211029114.pdf [file sj-pdf-1-cns-10.1177_11795735211029114.pdf]

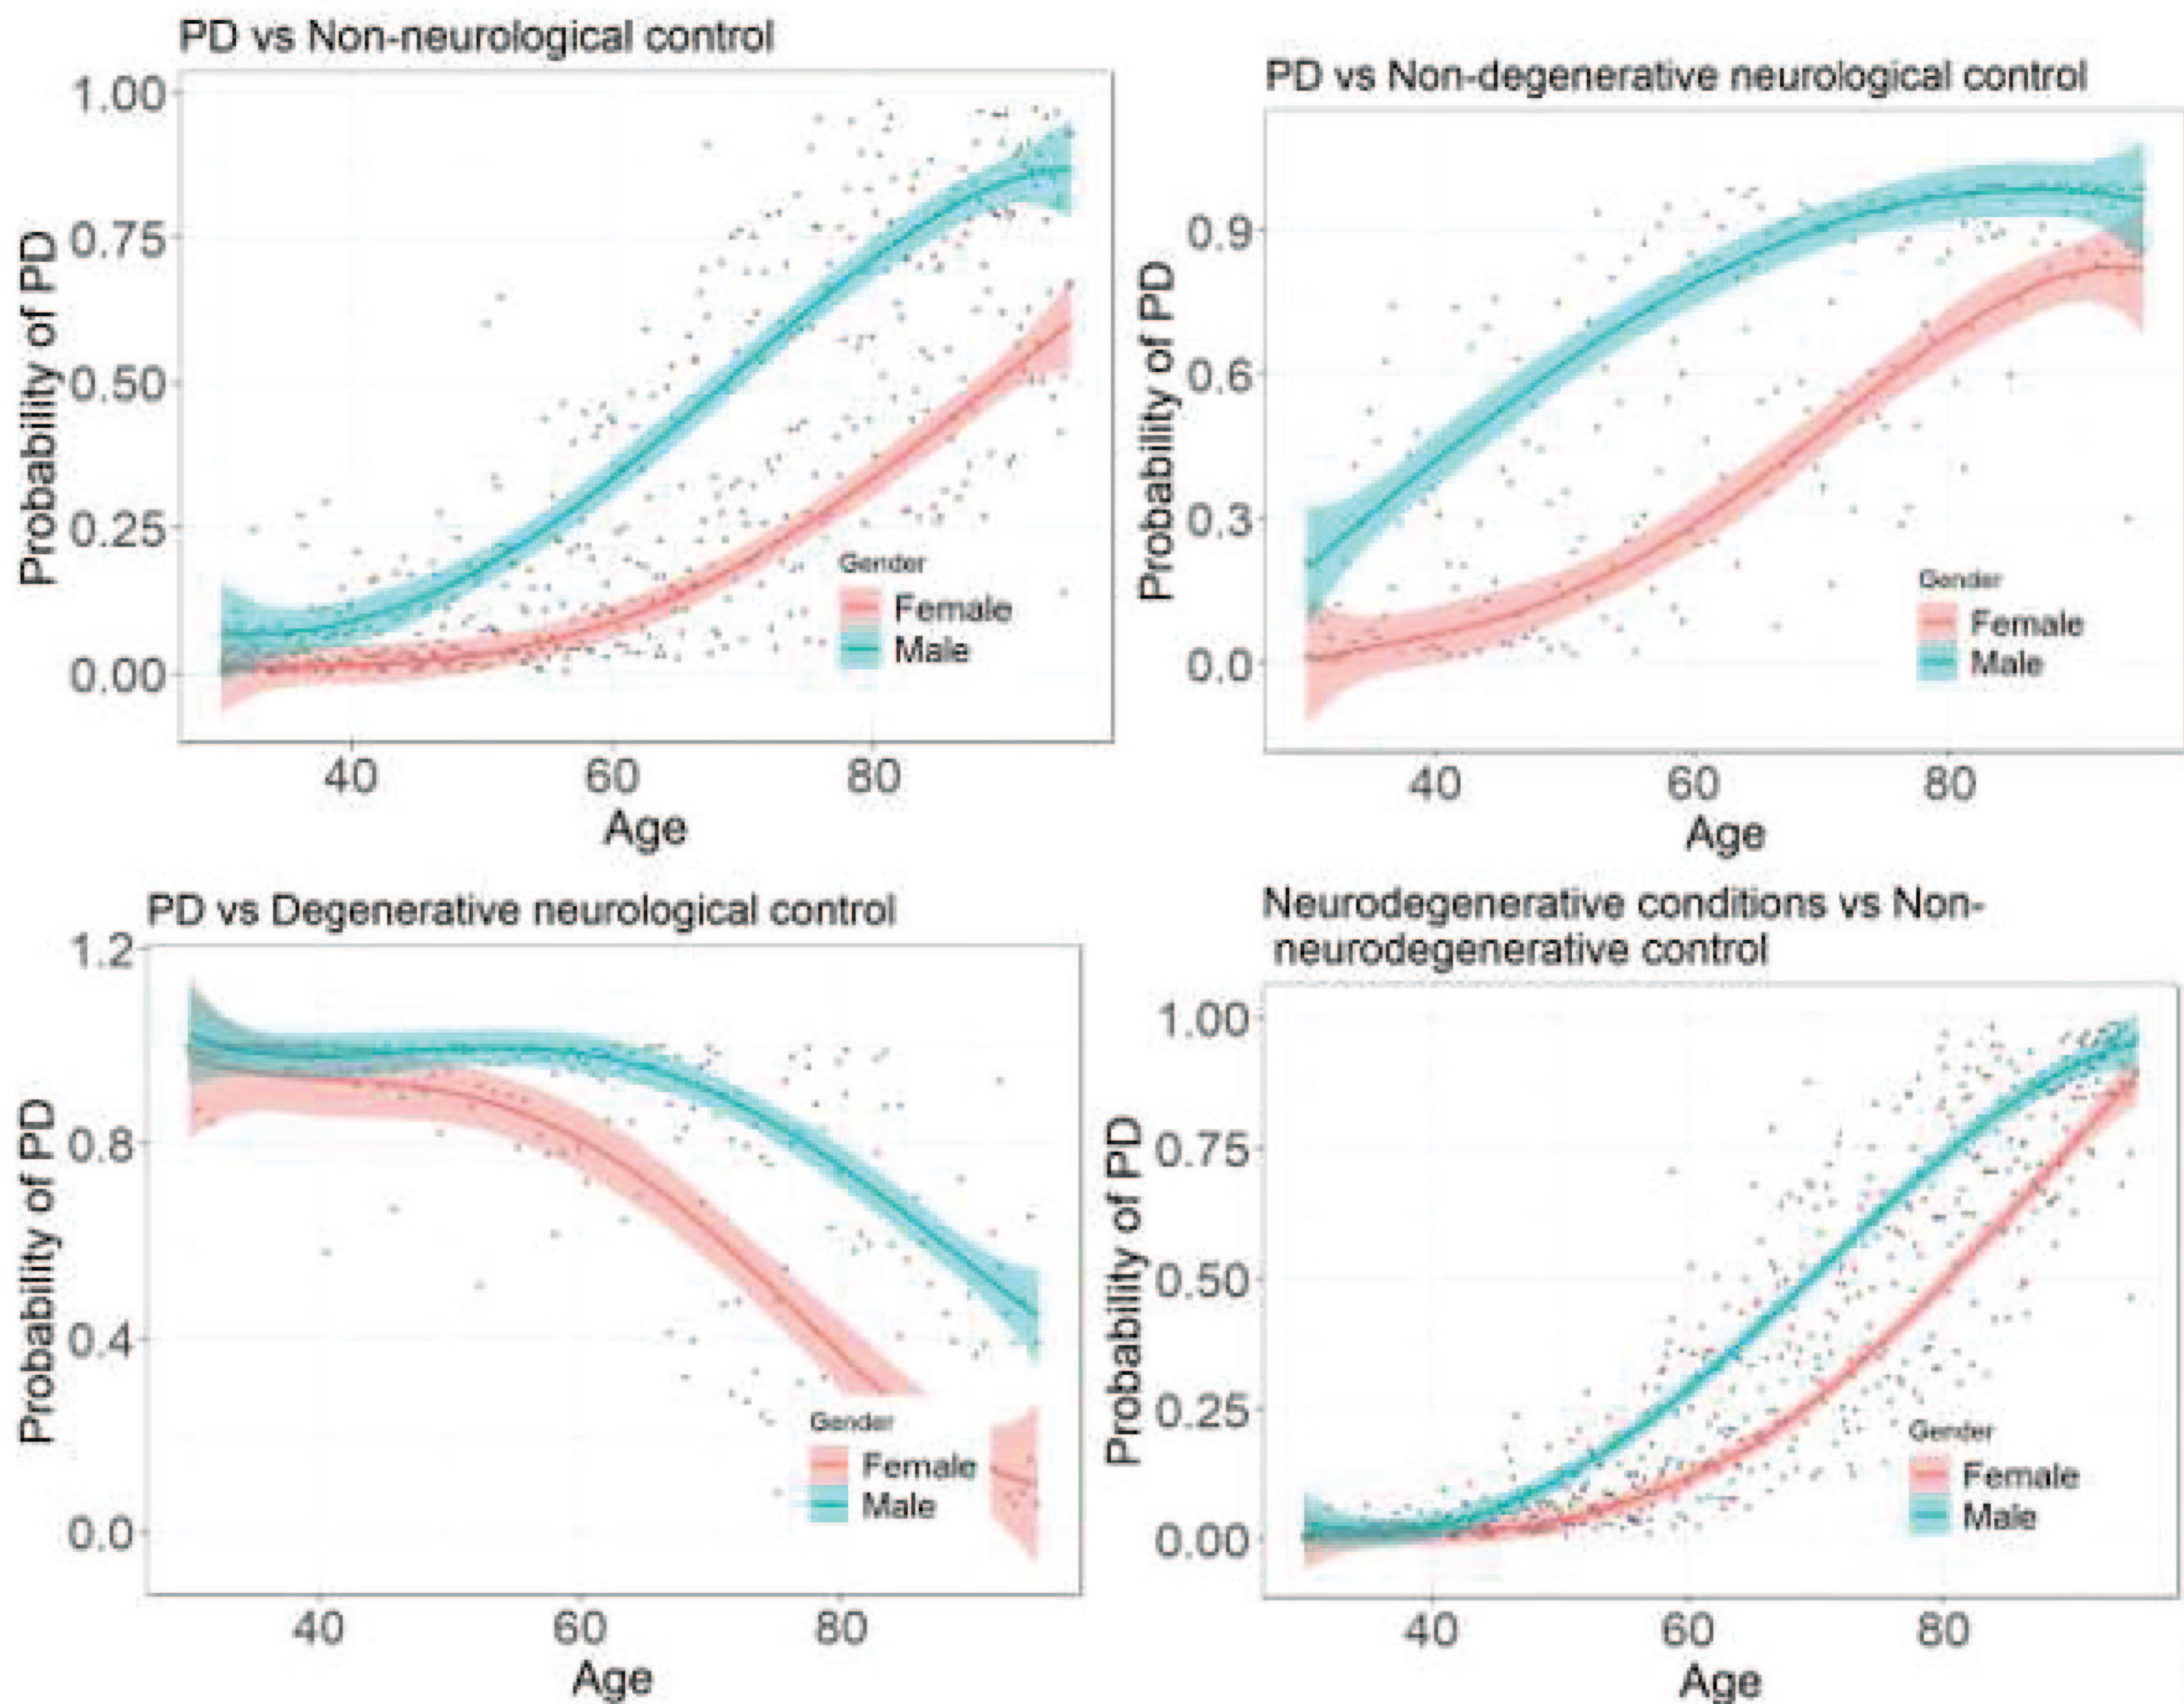

**Supplementary Fig 1.** Predicted probabilities of PD from the multivariable models for participants between 35-95 years, stratified by gender.
